# Supplementary material for: Prenatal Exposure to Chemical Mixtures and Inhibition among Adolescents
Source: MDPI journal article supplement (doi:10.3390/toxics9110311), 2021-11-16
Supplement: s1 [file s1]

## Supplementary Materials:

# Prenatal Exposure to Chemical Mixtures and Inhibition among Adolescents

Anna V. Oppenheimer, David C. Bellinger, Brent A. Coull, Marc G. Weisskopf, Michele Zemplenyi and Susan A. Korrick

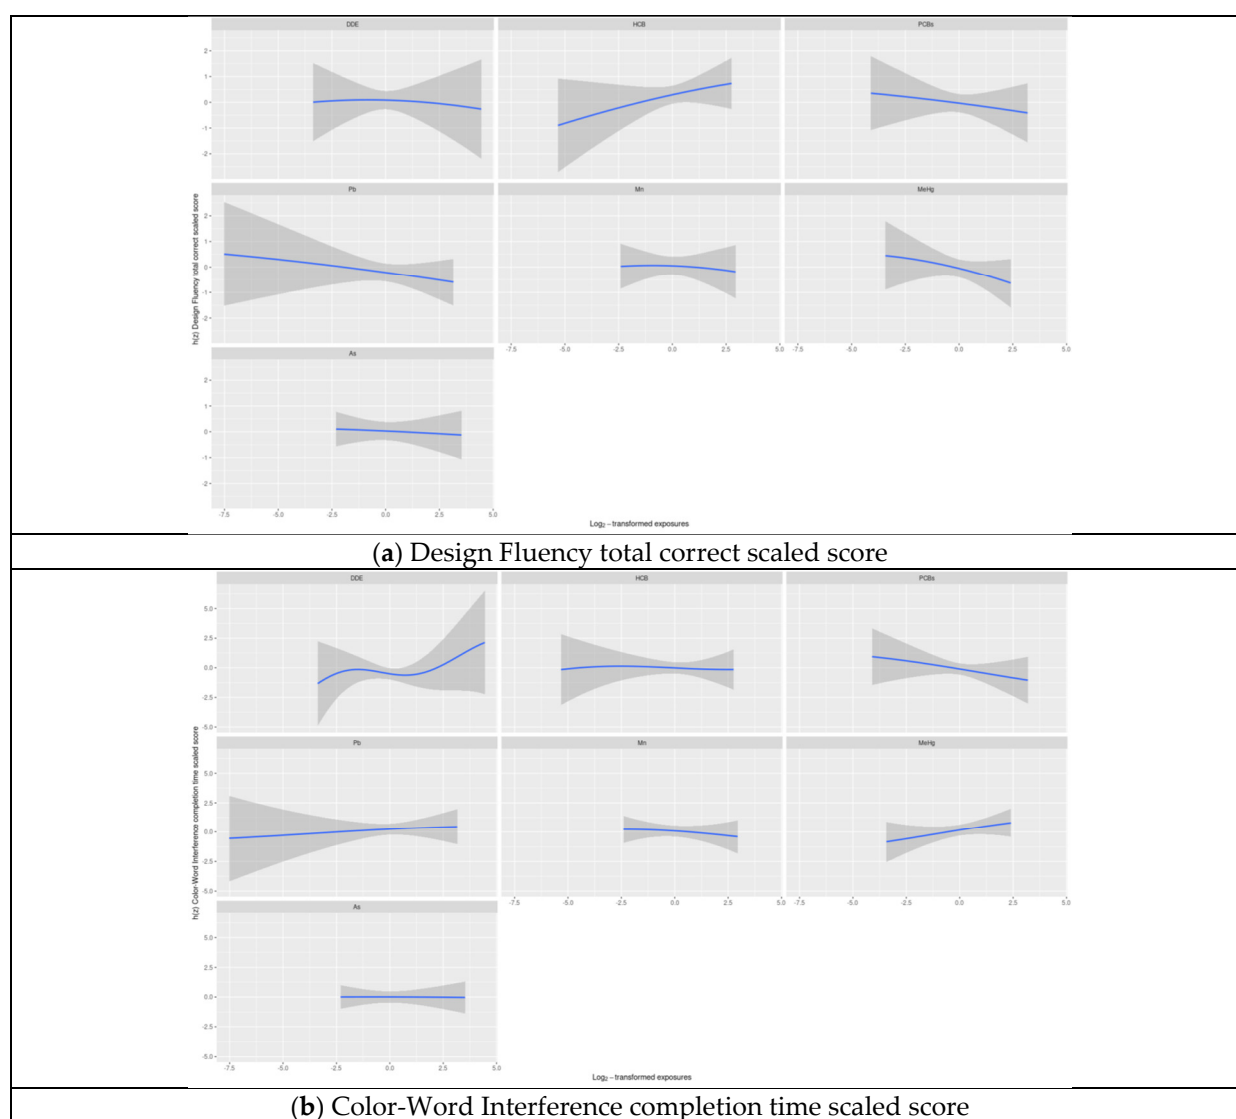

**Figure S1.** Estimated exposure–response functions and 95% credible intervals<sup>1</sup> of each of the seven exposures in Set 2<sup>2</sup> with the Delis–Kaplan Executive Function System inhibition scale scores, where all remaining exposures are assigned to their median value among adolescents in the secondary analysis group.

<sup>1</sup>Exposures have been log<sub>2</sub>-transformed and models have been adjusted for child race, sex, age at exam, year of birth and HOME score; maternal marital status at child's birth, IQ, seafood consumption during pregnancy, and smoking during pregnancy; maternal and paternal education and annual household income at child's birth; and study examiner. <sup>2</sup>Set 2: complete outcome, covariate and exposure data for PCBs, DDE, HCB, Pb, Mn, MeHg, and As,  $n = 235$ . Abbreviations: DDE: dichlorodiphenyldichloroethylene; HCB: hexachlorobenzene; PCBs: Sum of 4 PCB congeners (118, 138, 153, 180); Pb: lead; Mn: manganese, MeHg: methylmercury; As: arsenic.

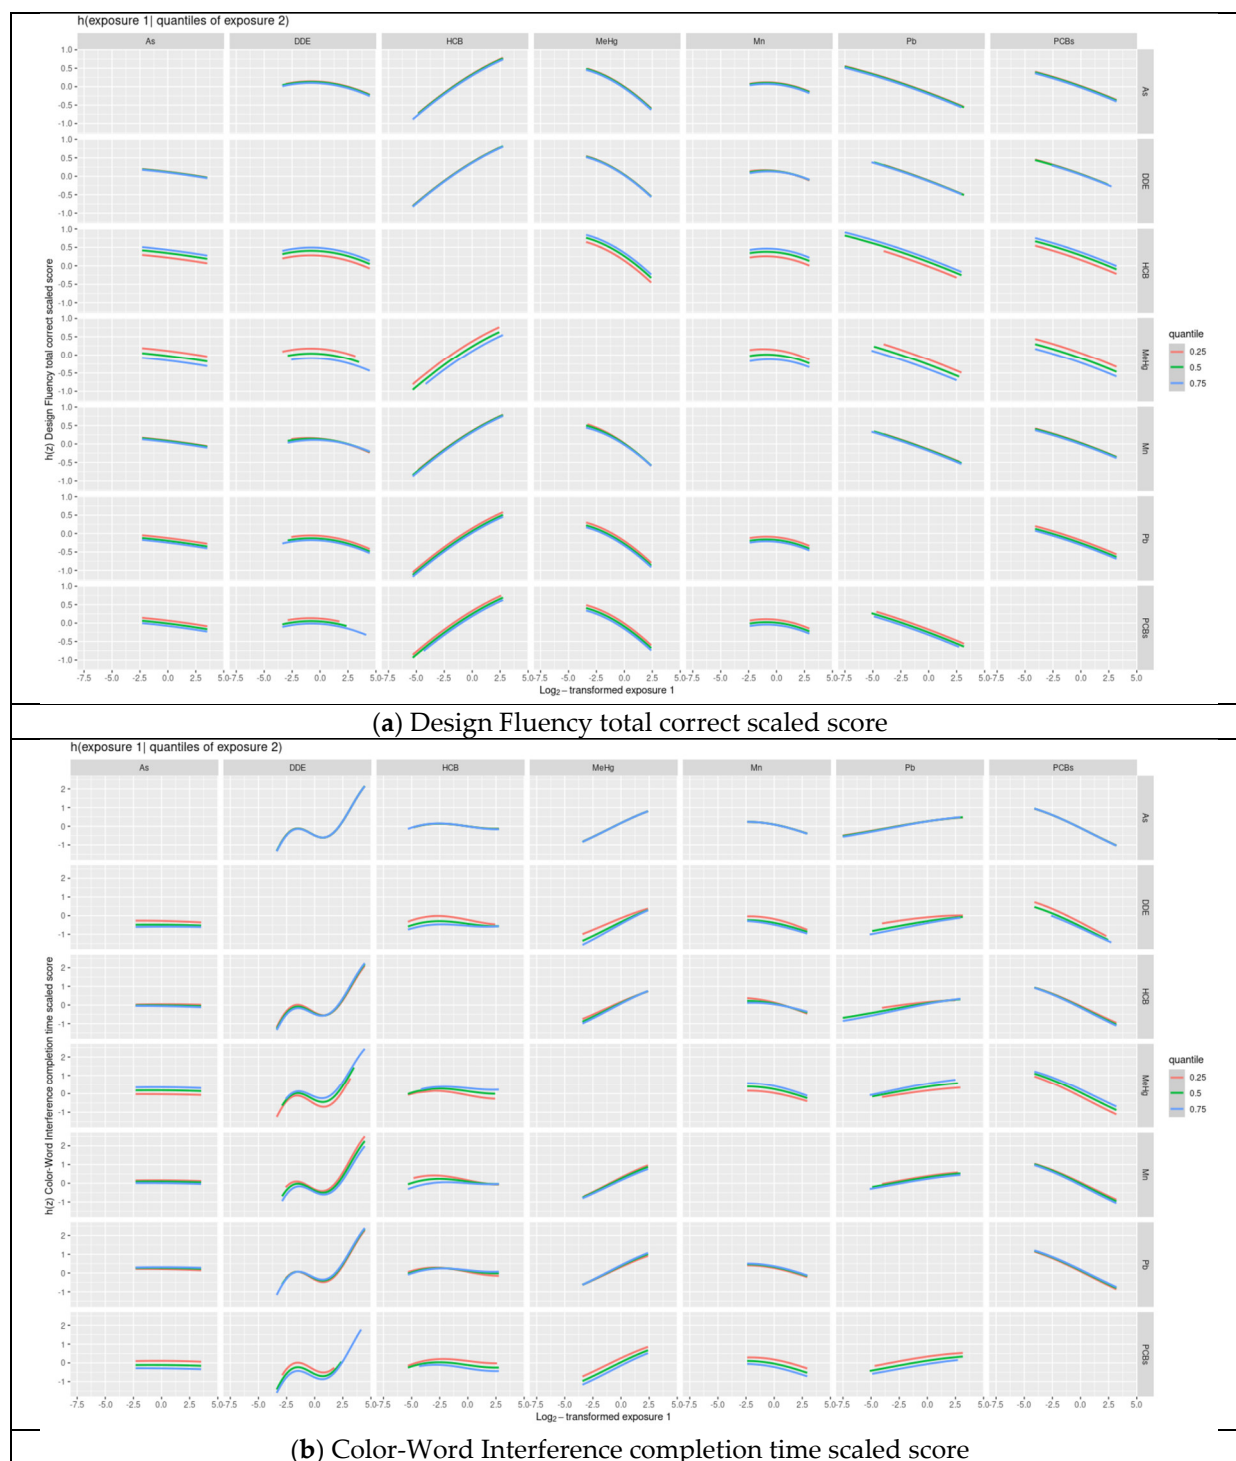

**Figure S2.** Exposure–response functions<sup>1</sup> associating each of the seven exposures (Set 2<sup>2</sup>) and a second exposure fixed at various quantiles with the Delis Kaplan Executive Function System inhibition scaled scores, while the remaining exposures are assigned to their median value among adolescents in the secondary analysis group.

<sup>1</sup>Exposures have been log<sub>2</sub>-transformed and models have been adjusted for child race, sex, age at exam, year of birth, and HOME score; maternal marital status at child's birth, IQ, seafood consumption during pregnancy, and smoking during pregnancy; maternal and paternal education and annual household income at child's birth; and study examiner. <sup>2</sup>Set 2: complete inhibition outcome, covariate and exposure data for PCBs, DDE, HCB, Pb, Mn, MeHg, and As,  $n = 235$ . Abbreviations: DDE: dichlorodiphenyldichloroethylene; HCB: hexachlorobenzene; ΣPCB<sub>4</sub>: Sum of 4 PCB congeners (118, 138, 153, 180); Pb: lead; Mn: manganese; MeHg: methylmercury; As: arsenic.

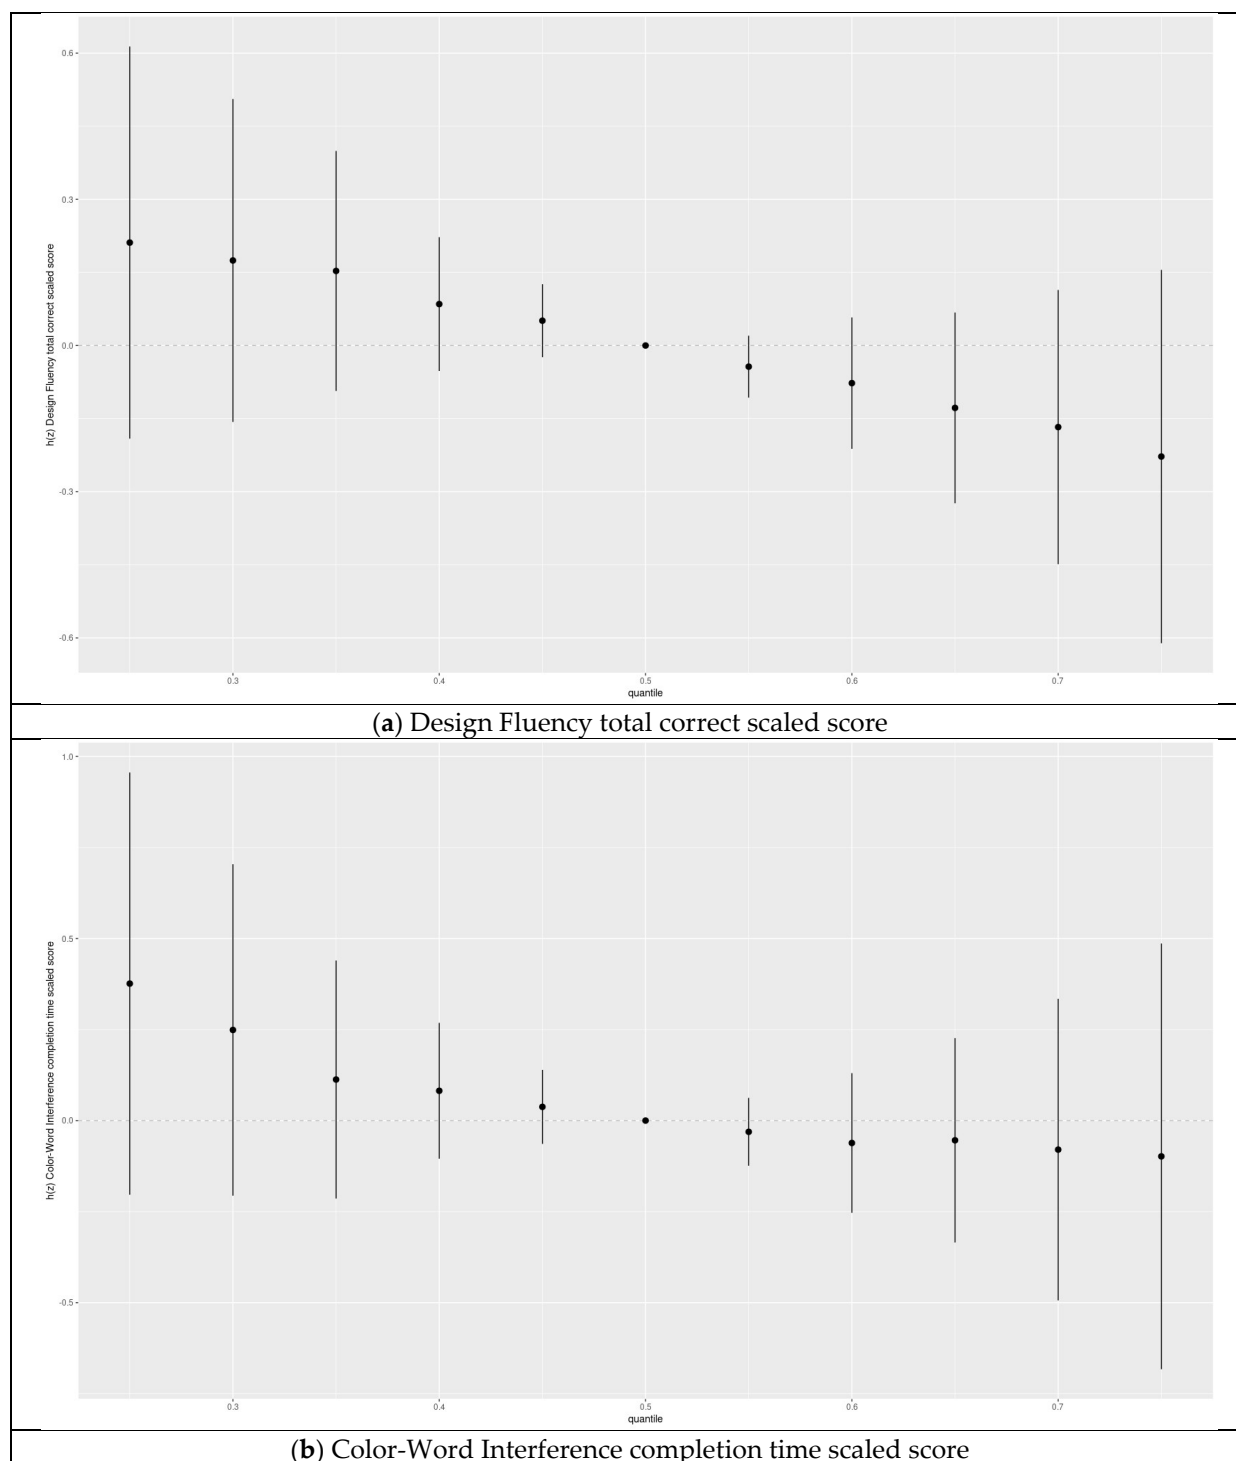

**Figure S3.** Joint association (estimates and 95% credible intervals)<sup>1</sup> of the seven-chemical mixture (DDE, HCB,  $\Sigma$ PCB<sub>4</sub>, Pb, Mn, MeHg, As) with the Delis–Kaplan Executive Function System inhibition scaled score among adolescents in the secondary analysis group (Set 2)<sup>2</sup>. Chemical mixture levels at each percentile are compared to a mixture with each component at its median level.

<sup>1</sup>Exposures have been log<sub>2</sub>-transformed and models have been adjusted for child race, sex, age at exam, year of birth, and HOME score; maternal marital status at child's birth, IQ, seafood consumption during pregnancy, and smoking during pregnancy; maternal and paternal education and annual household income at child's birth; and study examiner. <sup>2</sup>Set 2: complete inhibition outcome, covariate and exposure data for PCBs, DDE, HCB, Pb, Mn, MeHg, and As,  $n = 235$ . Abbreviations: DDE: dichlorodiphenyldichloroethylene; HCB: hexachlorobenzene;  $\Sigma$ PCB<sub>4</sub>: Sum of 4 PCB congeners (118, 138, 153, 180); Pb: lead; Mn: manganese; MeHg: methylmercury; As: arsenic.

**Table S1.** Characteristics of New Bedford Cohort participants included in the secondary analysis group (with a seven chemical exposure mixture)<sup>1</sup> and those who were excluded from the secondary analysis group.

| Descriptive Characteristic          | Main analysis group, <i>n</i> = 235 |             |           | Excluded group, <i>n</i> = 553 |             |           |                              |
|-------------------------------------|-------------------------------------|-------------|-----------|--------------------------------|-------------|-----------|------------------------------|
| Inhibition Measures <sup>2</sup>    | <i>n</i> (%)                        | Mean (SD)   | Range     | <i>n</i> (%)                   | Mean (SD)   | Range     | <i>p</i> -value <sup>3</sup> |
| Design Fluency                      |                                     |             |           |                                |             |           |                              |
| Total number correct scaled score   | 235                                 | 9.8 (2.6)   | 2–17      | 293                            | 9.2 (2.9)   | 1–19      | 0.01*                        |
| Total number errors raw score       | 235                                 | 2.2 (2.6)   | 0–18      | 293                            | 2.4 (3.2)   | 0–30      | 0.4                          |
| Color–Word Interference scores      |                                     |             |           |                                |             |           |                              |
| Completion time scaled score        | 235                                 | 10.2 (2.8)  | 1–16      | 292                            | 9.7 (2.8)   | 1–14      | 0.03*                        |
| Total number errors raw score       | 235                                 | 2.1 (2.2)   | 0–11      | 292                            | 2.5 (2.5)   | 0–19      | 0.02*                        |
| Overall performance                 |                                     |             |           |                                |             |           |                              |
| Best performance                    | 88 (37.4)                           |             |           | 66 (11.9)                      |             |           | < 0.01*                      |
| Poor performance                    | 147 (62.6)                          |             |           | 226 (40.9)                     |             |           |                              |
| Missing                             | 0                                   |             |           | 261 (47.2)                     |             |           |                              |
| Exposure Measures <sup>4</sup>      |                                     |             |           |                                |             |           |                              |
| Cord serum DDE (ng/g)               | 235                                 | 0.6 (1.4)   | 0.02–14.9 | 516                            | 0.4 (0.7)   | 0–10.2    | 0.04*                        |
| Cord serum HCB (ng/g)               | 235                                 | 0.03 (0.02) | 0–0.1     | 516                            | 0.03 (0.04) | 0–0.7     | 0.2                          |
| Cord serum ΣPCB <sub>4</sub> (ng/g) | 235                                 | 0.3 (0.3)   | 0.01–2.3  | 516                            | 0.2 (0.3)   | 0.01–4.4  | 0.2                          |
| Cord blood Pb (μg/dL)               | 235                                 | 1.4 (0.9)   | 0–9.4     | 513                            | 1.6 (1.5)   | 0.01–17.4 | 0.01*                        |
| Cord blood Mn (μg/dL)               | 235                                 | 4.3 (1.6)   | 1.7–11.2  | 473                            | 4.2 (1.9)   | 0.2–22.1  | 0.8                          |
| Maternal hair total Hg (μg/g)       | 235                                 | 0.6 (0.6)   | 0.03–3.1  | 276                            | 0.6 (0.7)   | 0.03–9.2  | 0.3                          |
| Maternal toenail As (μg/g)          | 235                                 | 0.1 (0.1)   | 0.02–0.8  | 181                            | 0.1 (0.1)   | 0.02–1.0  | 0.5                          |
| Covariate Measures <sup>5</sup>     |                                     |             |           |                                |             |           |                              |
| Child Characteristics               |                                     |             |           |                                |             |           |                              |
| Race/Ethnicity                      |                                     |             |           |                                |             |           | < 0.01*                      |
| Non–Hispanic White                  | 186 (79.1)                          |             |           | 345 (62.4)                     |             |           |                              |
| Hispanic                            | 16 (6.8)                            |             |           | 73 (13.2)                      |             |           |                              |
| Other                               | 33 (14.0)                           |             |           | 133 (24.1)                     |             |           |                              |
| Missing                             | 0                                   |             |           | 2 (0.4)                        |             |           |                              |
| Sex                                 |                                     |             |           |                                |             |           | 0.3                          |
| Male                                | 114 (48.5)                          |             |           | 294 (53.2)                     |             |           |                              |
| Female                              | 121 (51.5)                          |             |           | 259 (46.8)                     |             |           |                              |
| Age at Exam                         | 235                                 | 15.5 (0.6)  | 14.4–17.7 | 293                            | 15.6 (0.6)  | 13.9–17.9 | 0.5                          |
| Home Score                          | 235                                 | 44.4 (6.0)  | 27–56     | 256                            | 42.8 (6.5)  | 21–56     | < 0.01*                      |
| Year of birth                       |                                     |             |           |                                |             |           | 0.03*                        |
| 1993–1994                           | 76 (32.3)                           |             |           | 183 (33.1)                     |             |           |                              |
| 1995–1996                           | 104 (44.3)                          |             |           | 196 (35.4)                     |             |           |                              |
| 1997–1998                           | 55 (23.4)                           |             |           | 174 (31.5)                     |             |           |                              |
| Maternal Characteristics            |                                     |             |           |                                |             |           |                              |
| Marital status at birth             |                                     |             |           |                                |             |           | < 0.01*                      |
| Not married                         | 74 (31.5)                           |             |           | 257 (46.5)                     |             |           |                              |
| Married                             | 161 (68.5)                          |             |           | 241 (43.6)                     |             |           |                              |
| Missing                             | 0                                   |             |           | 55 (9.9)                       |             |           |                              |
| Maternal IQ                         | 235                                 | 100.6 (9.7) | 67–124    | 400                            | 96.3 (10.5) | 57–126    | < 0.01*                      |
| Seafood during pregnancy (serv/day) | 235                                 | 0.5 (0.6)   | 0–5.3     | 398                            | 0.6 (0.7)   | 0–6       | 0.5                          |
| Smoking during pregnancy            |                                     |             |           |                                |             |           | 0.3                          |
| No                                  | 171 (72.8)                          |             |           | 311 (56.2)                     |             |           |                              |
| Yes                                 | 64 (27.2)                           |             |           | 140 (25.3)                     |             |           |                              |
| Missing                             | 0                                   |             |           | 102 (18.4)                     |             |           |                              |
| Household Characteristics at Birth  |                                     |             |           |                                |             |           |                              |
| Maternal education                  |                                     |             |           |                                |             |           | < 0.01*                      |
| ≤ High School                       | 108 (46.0)                          |             |           | 313 (56.6)                     |             |           |                              |
| > High School                       | 127 (54.0)                          |             |           | 183 (33.1)                     |             |           |                              |
| Missing                             | 0                                   |             |           | 57 (10.3)                      |             |           |                              |
| Paternal Education                  |                                     |             |           |                                |             |           | 0.01*                        |

|                             |            |            |         |
|-----------------------------|------------|------------|---------|
| ≤ High School               | 152 (64.7) | 360 (65.1) |         |
| > High School               | 83 (35.3)  | 125 (22.6) |         |
| Missing                     | 0          | 68 (12.3)  |         |
| Annual Household Income     |            |            | < 0.01* |
| < \$20,000                  | 62 (26.4)  | 203 (36.7) |         |
| ≥ \$20,000                  | 173 (73.6) | 286 (51.7) |         |
| Missing                     | 0          | 64 (11.6)  |         |
| Examination Characteristics |            |            |         |
| Examiner                    |            |            | 0.3     |
| 1                           | 171 (72.8) | 227 (41.0) |         |
| 2                           | 64 (27.2)  | 66 (11.9)  |         |
| Missing                     | 0          | 260 (47.0) |         |

<sup>1</sup>Secondary analysis group (Set 2): complete inhibition outcome, covariate, and exposure data for, DDE, HCB, ΣPCB<sub>4</sub>, Pb, Mn, MeHg, and As, *n* = 235. <sup>2</sup>NBC participants with missing inhibition measures: Design Fluency total correct *n*=260, total errors *n* = 260; Color–Word Interference completion time *n*=261, total errors *n*=261. <sup>3</sup>*p*–values represent results comparing characteristics between participants included in Set 2 and those excluded from Set 2 using *t*–tests, Wilcoxon rank sum tests, and chi–square tests. *p*–values reflect comparisons based on non–missing data. <sup>4</sup>NBC participants with missing exposure measures: DDE *n* = 37; HCB *n* = 37; ΣPCB<sub>4</sub> *n* = 37; Pb *n* = 40; Mn *n* = 80; MeHg *n* = 277; As *n* = 372. <sup>5</sup>NBC participants with missing covariate measures: age at exam *n* = 260; HOME score *n* = 297; maternal IQ *n* = 153; seafood during pregnancy *n* = 155. \**p* < 0.05. Abbreviations: DDE: dichlorodiphenyldichloroethylene; HCB: hexachlorobenzene; ΣPCB<sub>4</sub>: Sum of 4 PCB congeners (118, 138, 153, 180); Pb: lead; Mn: manganese; Hg: mercury; As: arsenic.

**Table S2.** Inverse probability weighted results of multivariable linear regression analyses (difference in scaled scores associated with a twofold increase in exposure and 95% CI)<sup>1</sup> assessing the relation of prenatal exposure to a five-chemical mixture with Delis Kaplan Executive Function System inhibition scaled scores among adolescents in the main analysis group<sup>2</sup>.

| Exposure                                                | Design Fluency total correct scaled score | Color-Word Interference completion time scaled score |
|---------------------------------------------------------|-------------------------------------------|------------------------------------------------------|
|                                                         | Difference (95% CI)                       | Difference (95% CI)                                  |
| Log <sub>2</sub> DDE                                    | 0.01 (−0.31, 0.33)                        | 0.07 (−0.24, 0.38)                                   |
| Log <sub>2</sub> HCB                                    | −0.01 (−0.33, 0.31)                       | −0.08 (−0.42, 0.26)                                  |
| Log <sub>2</sub> ΣPCB <sub>4</sub>                      | −0.15 (−0.48, 0.18)                       | −0.22 (−0.56, 0.12)                                  |
| Log <sub>2</sub> Pb                                     | 0.02 (−0.29, 0.33)                        | 0.11 (−0.21, 0.44)                                   |
| Log <sub>2</sub> Mn                                     | 0.87 (−0.05, 1.79)                        | −0.84 (−1.44, −0.23) *                               |
| Log <sub>2</sub> Mn <sup>2</sup>                        | −0.67 (−1.53, 0.19)                       |                                                      |
| Log <sub>2</sub> DDE × Log <sub>2</sub> Mn              | 0.54 (0.06, 1.01) *                       |                                                      |
| Log <sub>2</sub> DDE × Log <sub>2</sub> Mn <sup>2</sup> | 0.05 (−0.47, 0.57)                        |                                                      |

<sup>1</sup>Exposures have been log<sub>2</sub>-transformed and models have been adjusted for all listed exposures, child race, sex, age at exam, year of birth, and HOME score; maternal marital status at child's birth, IQ, seafood consumption during pregnancy, and smoking during pregnancy; maternal and paternal education and annual household income at child's birth; study examiner. <sup>2</sup>Main analysis group: complete inhibition outcome, covariate and exposure data for PCBs, DDE, HCB, Pb and Mn. <sup>2</sup>Total *n* = 373. \**p* < 0.05. Abbreviations: DDE: dichlorodiphenyldichloroethylene; HCB: hexachlorobenzene; ΣPCB<sub>4</sub>: Sum of 4 PCB congeners (118, 138, 153, 180); Pb: lead; Mn: manganese.

**Table S3.** Inverse probability weighted sex-stratified results of multivariable linear regression analyses (difference in scaled scores associated with a twofold increase in exposure and 95% CI)<sup>1</sup> assessing the relation of prenatal exposure to a five-chemical mixture with Delis Kaplan Executive Function System inhibition scaled scores among adolescents in the main analysis group<sup>2</sup>.

| Exposure                                                | Design Fluency total correct scaled score |                                   |                       | Color-Word Interference completion time scaled score |                                   |                       |
|---------------------------------------------------------|-------------------------------------------|-----------------------------------|-----------------------|------------------------------------------------------|-----------------------------------|-----------------------|
|                                                         | Males<br>Difference<br>(95% CI)           | Females<br>Difference<br>(95% CI) | <i>p</i> <sup>3</sup> | Males<br>Difference<br>(95% CI)                      | Females<br>Difference<br>(95% CI) | <i>p</i> <sup>3</sup> |
| Log <sub>2</sub> DDE                                    | −0.23 (−0.75, 0.29)                       | −0.15 (−0.63, 0.34)               | 0.5                   | −0.02 (−0.49, 0.45)                                  | 0.24 (−0.23, 0.72)                | 0.4                   |
| Log <sub>2</sub> HCB                                    | −0.28 (−0.73, 0.17)                       | 0.37 (−0.10, 0.84)                | 0.1                   | −0.02 (−0.53, 0.49)                                  | −0.12 (−0.60, 0.37)               | 0.8                   |
| Log <sub>2</sub> ΣPCB <sub>4</sub>                      | 0.03 (−0.45, 0.52)                        | −0.24 (−0.77, 0.28)               | 1.0                   | −0.10 (−0.62, 0.42)                                  | −0.46 (−0.97, 0.04)               | 0.5                   |
| Log <sub>2</sub> Pb                                     | 0.47 (−0.06, 1.00)                        | −0.25 (−0.63, 0.13)               | 0.2                   | 0.25 (−0.35, 0.84)                                   | −0.03 (−0.41, 0.36)               | 0.6                   |
| Log <sub>2</sub> Mn                                     | 1.81 (0.39, 3.23) *                       | −0.10 (−1.48, 1.28)               | 0.1                   | −0.86 (−1.76, 0.04)                                  | −0.58 (−1.43, 0.27)               | 0.5                   |
| Log <sub>2</sub> Mn <sup>2</sup>                        | 0.09 (−1.20, 1.39)                        | −0.19 (−1.46, 1.08)               | 0.5                   |                                                      |                                   |                       |
| Log <sub>2</sub> DDE × Log <sub>2</sub> Mn              | 0.84 (0.10, 1.59) *                       | 0.08 (−0.64, 0.80)                | 0.2                   |                                                      |                                   |                       |
| Log <sub>2</sub> DDE × Log <sub>2</sub> Mn <sup>2</sup> | 0.54 (−0.28, 1.37)                        | 0.06 (−0.68, 0.79)                | 0.2                   |                                                      |                                   |                       |

<sup>1</sup>Exposures have been log<sub>2</sub>-transformed and models have been adjusted for all listed exposures, child race, sex, age at exam, year of birth, and HOME score; maternal marital status at child's birth, IQ, seafood consumption during pregnancy, and smoking during pregnancy; maternal and paternal education and annual household income at child's birth; study examiner. <sup>2</sup>Main analysis group: complete inhibition outcome, covariate and exposure data for PCBs, DDE, HCB, Pb and Mn. Total *n* = 373; Males *n* = 179; Females *n* = 194. <sup>3</sup>*p*-value for chemical-sex interaction term included in multivariable linear regression model. \**p* < 0.05. Abbreviations: DDE: dichlorodiphenyldichloroethylene; HCB: hexachlorobenzene; ΣPCB<sub>4</sub>: Sum of 4 PCB congeners (118, 138, 153, 180); Pb: lead; Mn: manganese.

**Table S4.** Inverse probability weighted prenatal social disadvantage index (PNSDI)<sup>1</sup>—stratified results of multivariable linear regression analyses (difference in scaled scores associated with a twofold increase in exposure and 95% CI)<sup>2</sup> assessing the relation of prenatal exposure to a five-chemical mixture with Delis–Kaplan Executive Function System inhibition scaled scores among adolescents in the main analysis group<sup>3</sup>.

| Exposure                                                | Design Fluency total correct scaled score |                       |                       | Color–Word Interference completion time scaled score |                     |                       |
|---------------------------------------------------------|-------------------------------------------|-----------------------|-----------------------|------------------------------------------------------|---------------------|-----------------------|
|                                                         | PNSDI < 3                                 | PNSDI ≥ 3             | <i>p</i> <sup>4</sup> | PNSDI < 3                                            | PNSDI ≥ 3           | <i>p</i> <sup>4</sup> |
|                                                         | Difference (95% CI)                       | Difference (95% CI)   |                       | Difference (95% CI)                                  | Difference (95% CI) |                       |
| Log <sub>2</sub> DDE                                    | −0.07 (−0.48, 0.34)                       | −0.06 (−0.62, 0.50)   | 0.5                   | 0.28 (−0.09, 0.64)                                   | −0.27 (−0.88, 0.34) | 0.3                   |
| Log <sub>2</sub> HCB                                    | 0.30 (−0.10, 0.70)                        | −0.62 (−1.17, −0.08)* | 0.01*                 | 0.02 (−0.40, 0.45)                                   | −0.20 (−0.78, 0.39) | 0.3                   |
| Log <sub>2</sub> ΣPCB <sub>4</sub>                      | −0.21 (−0.60, 0.19)                       | 0.17 (−0.51, 0.85)    | 0.3                   | −0.40 (−0.81, 0.00)                                  | 0.15 (−0.51, 0.81)  | 0.2                   |
| Log <sub>2</sub> Pb                                     | −0.34 (−0.74, 0.06)                       | 0.39 (−0.15, 0.92)    | 0.1                   | 0.01 (−0.40, 0.43)                                   | 0.15 (−0.43, 0.74)  | 0.9                   |
| Log <sub>2</sub> Mn                                     | 1.31 (0.20, 2.42)*                        | 1.54 (−1.02, 4.09)    | 1.0                   | −0.98 (−1.73, −0.22)*                                | −0.73 (−1.79, 0.33) | 1.0                   |
| Log <sub>2</sub> Mn <sup>2</sup>                        | 0.52 (−0.64, 1.68)                        | −2.25 (−4.43, −0.06)* | 0.1                   |                                                      |                     |                       |
| Log <sub>2</sub> DDE × Log <sub>2</sub> Mn              | 0.46 (−0.13, 1.04)                        | 0.93 (−0.23, 2.09)    | 0.7                   |                                                      |                     |                       |
| Log <sub>2</sub> DDE × Log <sub>2</sub> Mn <sup>2</sup> | 0.45 (−0.26, 1.17)                        | −0.29 (−1.30, 0.71)   | 0.4                   |                                                      |                     |                       |

<sup>1</sup>Prenatal social disadvantage index (PNSDI) was constructed as the sum of five adverse social or economic exposures at the time of the child's birth where presence of each risk factor was assigned a value of 1, absence a value of 0: mother unmarried, mother's education as high school graduate or less, father's education as high school graduate or less, annual household income less than USD 20,000, and mother's age at birth less than 20 years. <sup>2</sup>Exposures have been log<sub>2</sub>–transformed and models have been adjusted for all listed exposures, child race, sex, age at exam, year of birth, and HOME score; maternal marital status at child's birth, IQ, seafood consumption during pregnancy, and smoking during pregnancy; maternal and paternal education and annual household income at child's birth; study examiner. <sup>3</sup>Main analysis group: complete inhibition outcome, covariate and exposure data for PCBs, DDE, HCB, Pb and Mn. Total *n* = 373; PNSDI < 3 *n* = 241; PNSDI ≥ 3 *n* = 132. <sup>4</sup>*P*–value for chemical–PNSDI interaction term included in multivariable linear regression model. \**p* < 0.05. Abbreviations: DDE: dichlorodiphenyldichloroethylene; HCB: hexachlorobenzene; ΣPCB<sub>4</sub>: Sum of 4 PCB congeners (118, 138, 153, 180); Pb: lead; Mn: manganese.



**Table S5.** Inverse probability weighted results of negative binomial regression analyses (rate ratio and 95% CI)<sup>1</sup> assessing the relation of prenatal exposure to a five-chemical mixture with Delis–Kaplan Executive Function System (D–KEFS) inhibition error raw scores among adolescents in the main analysis group<sup>2</sup>.

| Exposure                           | Design Fluency total errors | Color–Word Interference total errors |
|------------------------------------|-----------------------------|--------------------------------------|
|                                    | Rate ratio (95% CI)         | Rate ratio (95% CI)                  |
| Log <sub>2</sub> DDE               | 1.04 (0.93, 1.17)           | 0.92 (0.83, 1.03)                    |
| Log <sub>2</sub> HCB               | 1.09 (0.96, 1.25)           | 1.07 (0.95, 1.21)                    |
| Log <sub>2</sub> ΣPCB <sub>4</sub> | 0.94 (0.82, 1.07)           | 1.11 (0.98, 1.25)                    |
| Log <sub>2</sub> Pb                | 1.01 (0.89, 1.14)           | 0.92 (0.83, 1.03)                    |
| Log <sub>2</sub> Mn                | 0.73 (0.58, 0.92) *         | 1.09 (0.88, 1.34)                    |

<sup>1</sup>Exposures have been log<sub>2</sub>–transformed and models have been adjusted for child race, sex, age at exam, year of birth, and HOME score; maternal marital status at child’s birth, IQ, seafood consumption during pregnancy, and smoking during pregnancy; maternal and paternal education and annual household income at child’s birth; and study examiner.<sup>2</sup>Main analysis group: complete inhibition outcome, covariate and prenatal exposure biomarker data for DDE, HCB, ΣPCB<sub>4</sub>, Pb and Mn,  $n = 373$ . \*  $p < 0.05$ . Abbreviations: DDE: dichlorodiphenyldichloroethylene; HCB: hexachlorobenzene; ΣPCB<sub>4</sub>: Sum of 4 PCB congeners (118, 138, 153, 180); Pb: lead; Mn: manganese.

**Table S6.** Inverse probability weighted results of logistic regression analyses (odds ratio and 95% CI)<sup>1</sup> assessing the relation of pre-natal exposure to a five- chemical mixture with Delis–Kaplan Executive Function System (D–KEFS) Color–Word Interference: Inhibition overall performance<sup>2</sup> among adolescents in the main analysis group<sup>3</sup>.

| Exposure                           | Color–Word Interference overall performance |
|------------------------------------|---------------------------------------------|
|                                    | Odds ratio (95% CI)                         |
|                                    | <i>Best performance: n = 117</i>            |
|                                    | <i>Poor performance: n = 256</i>            |
| Log <sub>2</sub> DDE               | 0.92 (0.70, 1.21)                           |
| Log <sub>2</sub> HCB               | 1.24 (0.94, 1.64)                           |
| Log <sub>2</sub> ΣPCB <sub>4</sub> | 1.15 (0.86, 1.53)                           |
| Log <sub>2</sub> Pb                | 0.77 (0.58, 1.04)                           |
| Log <sub>2</sub> Mn                | 1.69 (1.02, 2.81) *                         |

<sup>1</sup>Exposures have been log<sub>2</sub>–transformed and models have been adjusted for child race, sex, age at exam, year of birth, and HOME score; maternal marital status at child’s birth, IQ, seafood consumption during pregnancy, and smoking during pregnancy; maternal and paternal education and annual household income at child’s birth; and study examiner. <sup>2</sup>Reference is best performance group (total completion time raw score < median and total errors raw score < median) compared to remaining participants (poor performance group). <sup>3</sup>Main analysis group: complete inhibition outcome, covariate and prenatal exposure biomarker data for DDE, HCB, ΣPCB<sub>4</sub>, Pb and Mn, *n* = 373. \**p* < 0.05. Abbreviations: DDE: dichlorodiphenyldichloroethylene; HCB: hexachlorobenzene; ΣPCB<sub>4</sub>: Sum of 4 PCB congeners (118, 138, 153, 180); Pb: lead; Mn: manganese.

**Table S7.** Complete-case results of multivariable linear regression analyses (difference in scaled scores associated with a twofold increase in exposure and 95% CI)<sup>1</sup> assessing the relation of prenatal exposure to a seven-chemical mixture with Delis Kaplan Executive Function System inhibition scaled scores among adolescents in the secondary analysis group<sup>2</sup>.

| Exposure                           | Design Fluency total correct scaled score | Color–Word Interference completion time scaled score |
|------------------------------------|-------------------------------------------|------------------------------------------------------|
|                                    | Difference (95% CI)                       | Difference (95% CI)                                  |
| Log <sub>2</sub> DDE               | 0.02 (−0.40, 0.43)                        | 0.32 (−0.11, 0.75)                                   |
| Log <sub>2</sub> HCB               | 0.29 (−0.11, 0.69)                        | 0.03 (−0.38, 0.44)                                   |
| Log <sub>2</sub> ΣPCB <sub>4</sub> | −0.23 (−0.70, 0.24)                       | −0.54 (−1.02, −0.06) *                               |
| Log <sub>2</sub> Pb                | −0.27 (−0.67, 0.12)                       | 0.07 (−0.34, 0.47)                                   |
| Log <sub>2</sub> Mn                | −0.12 (−0.84, 0.61)                       | −0.64 (−1.38, 0.11)                                  |
| Log <sub>2</sub> MeHg              | −0.20 (−0.56, 0.17)                       | 0.36 (−0.02, 0.73)                                   |
| Log <sub>2</sub> As                | −0.06 (−0.41, 0.29)                       | 0.00 (−0.37, 0.36)                                   |

<sup>1</sup>Exposures have been log<sub>2</sub>–transformed and models have been adjusted for all listed exposures, child race, sex, age at exam, year of birth, and HOME score; maternal marital status at child’s birth, IQ, seafood consumption during pregnancy, and smoking during pregnancy; maternal and paternal education and annual household income at child’s birth; study examiner. <sup>2</sup>Secondary analysis group: complete inhibition outcome, covariate and exposure data for DDE, HCB, ΣPCB<sub>4</sub>, Pb, Mn, MeHg, As, total *n*=235. Abbreviations: DDE: dichlorodiphenyldichloroethylene; HCB: hexachlorobenzene; ΣPCB<sub>4</sub>: Sum of 4 PCB congeners (118, 138, 153, 180); Pb: lead; Mn: manganese; MeHg: methylmercury; As: arsenic.

**Table S8.** Inverse probability weighted results of multivariable linear regression analyses (difference in scaled scores associated with a twofold increase in exposure and 95% CI)<sup>1</sup> assessing the relation of prenatal exposure to a seven-chemical mixture with Delis Kaplan Executive Function System inhibition scaled scores among adolescents in the secondary analysis group<sup>2</sup>.

| Exposure                           | Design Fluency total correct scaled score | Color–Word Interference completion time scaled score |
|------------------------------------|-------------------------------------------|------------------------------------------------------|
|                                    | Difference (95% CI)                       | Difference (95% CI)                                  |
| Log <sub>2</sub> DDE               | 0.04 (−0.37, 0.45)                        | 0.27 (−0.16, 0.70)                                   |
| Log <sub>2</sub> HCB               | 0.20 (−0.19, 0.59)                        | 0.06 (−0.35, 0.47)                                   |
| Log <sub>2</sub> ΣPCB <sub>4</sub> | −0.25 (−0.72, 0.23)                       | −0.57 (−1.07, −0.08) *                               |
| Log <sub>2</sub> Pb                | −0.12 (−0.52, 0.28)                       | 0.12 (−0.31, 0.54)                                   |
| Log <sub>2</sub> Mn                | −0.27 (−1.01, 0.47)                       | −0.49 (−1.26, 0.29)                                  |
| Log <sub>2</sub> MeHg              | −0.29 (−0.67, 0.09)                       | 0.37 (−0.02, 0.77)                                   |
| Log <sub>2</sub> As                | −0.05 (−0.42, 0.32)                       | 0.00 (−0.39, 0.39)                                   |

<sup>1</sup>Exposures have been log<sub>2</sub>–transformed and models have been adjusted for all listed exposures, child race, sex, age at exam, year of birth, and HOME score; maternal marital status at child’s birth, IQ, seafood consumption during pregnancy, and smoking during pregnancy; maternal and paternal education and annual household income at child’s birth; study examiner. <sup>2</sup>Secondary analysis group: complete inhibition outcome, covariate and exposure data for DDE, HCB, ΣPCB<sub>4</sub> Pb, Mn, MeHg, and As, *n* = 235. Abbreviations: DDE: dichlorodiphenyldichloroethylene; HCB: hexachlorobenzene; ΣPCB<sub>4</sub>: Sum of 4 PCB congeners (118, 138, 153, 180); Pb: lead; Mn: manganese; MeHg: methylmercury; As: arsenic.
